# Supplementary material
Source: PubMed Central journal article supplement (PMC9886762)
Supplement: 11357_2022_688_MOESM1_ESM.pdf [file 11357_2022_688_MOESM1_ESM.pdf]

# Summary of the current treatment approach to asymptomatic carotid stenosis based on European, American and Chinese published guidelines

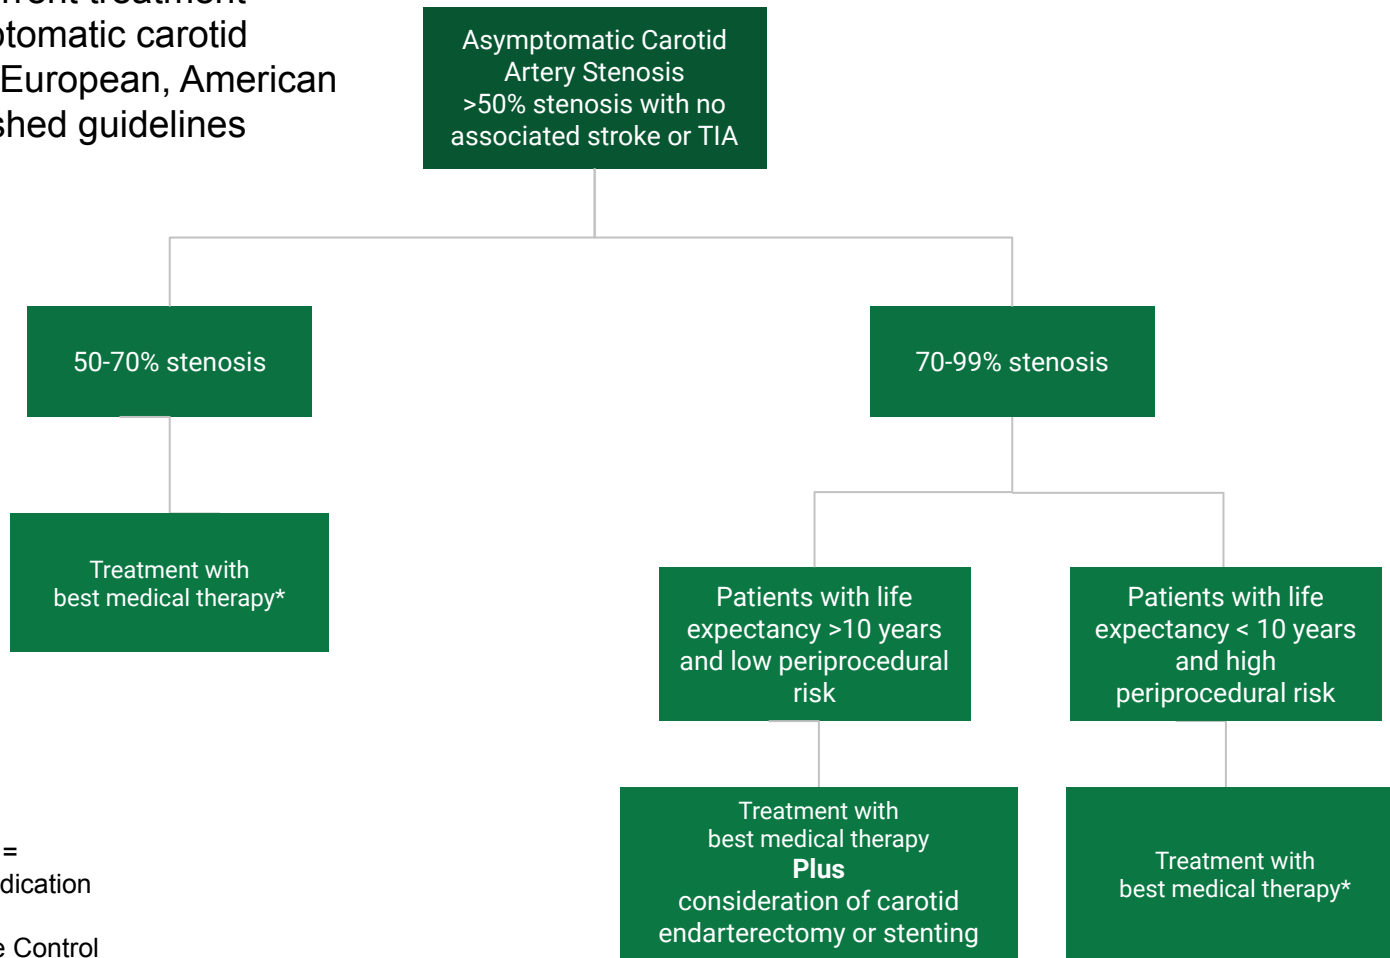

\*Best Medical Therapy =  
Antiplatelet Medication  
Lipid Lowering  
Blood Pressure Control
